RESEARCH ARTICLE

# Elective Tracheotomy Practices in Turkey

Bulent Gucyetmez<sup>1☯\*</sup>, Hakan Korkut Atalan<sup>2</sup>, Nahit Cakar<sup>1☯</sup>, On behalf of Turkish Tracheotomy Survey Group<sup>¶</sup>

**1** Department of Anesthesiology, Acibadem University School of Medicine, Istanbul, Turkey, **2** Department of Anesthesiology, Ataşehir Memorial Hospital, Istanbul, Turkey

☯ These authors contributed equally to this work.

¶ Membership of the Turkish Tracheotomy Survey Group is listed in the Acknowledgments.

\* [bulentgucyetmez@gmail.com](mailto:bulentgucyetmez@gmail.com)

## Abstract

### Objectives

Elective tracheotomy (ET) procedures in intensive care units (ICU) might be different in accordance with countries and ICUs' features. The aim of the present study was to search the epidemiology of ET procedures in Turkey.

### Methods

A questionnaire which consists of 43 questions was sent by e-mail to 238 ICUs which were officially recognized by The Turkish Ministry of Health. All answers were obtained between August 1, 2015 and August 31, 2015.

### Results

Two hundred and three ICUs (85.3%) participated in this study. 177 (87.2%) and 169 (83.4%) of ICU's were level III and mixed ICUs respectively. Anesthesiologists were the director of 189 (93.0%) ICUs. Estimated total count of admitted, mechanically ventilated and tracheotomized patients in 2014 were 126282, 80569 (63.8%) and 8989 (7.1%) respectively. Most common indication for ET was prolonged mechanical ventilation (76.9%). The first choice for ET procedure was percutaneous in 162 (79.8%) ICUs. Griggs guide wire dilatational forceps (GWDF) technique was used as the first choice for elective percutaneous tracheotomy (EPT) by 143 (70.4%) ICUs. Most common early EPT complication was bleeding (68.0%) and late EPT complication was stenosis (35.0%). While facilitation of weaning was most important advantage (26.1%), bleeding and tracheal complications were most important disadvantages for EPT (29.1%).

### Conclusions

Most common indications for ET are prolonged MV and coma in Turkish ICUs. EPT is the preferred procedure for ET and GWDF is the most common technique. Bronchoscopy and USG are rarely used as a guide.

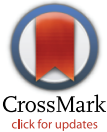

CrossMark  
click for updates

## OPEN ACCESS

**Citation:** Gucyetmez B, Atalan HK, Cakar N, On behalf of Turkish Tracheotomy Survey Group (2016) Elective Tracheotomy Practices in Turkey. PLoS ONE 11(11): e0166097. doi:10.1371/journal.pone.0166097

**Editor:** Chiara Lazzeri, Azienda Ospedaliero Universitaria Careggi, ITALY

**Received:** July 27, 2016

**Accepted:** October 21, 2016

**Published:** November 15, 2016

**Copyright:** © 2016 Gucyetmez et al. This is an open access article distributed under the terms of the [Creative Commons Attribution License](https://creativecommons.org/licenses/by/4.0/), which permits unrestricted use, distribution, and reproduction in any medium, provided the original author and source are credited.

**Data Availability Statement:** All relevant data are within the paper and its Supporting Information files.

**Funding:** The authors received no specific funding for this work.

**Competing Interests:** The authors have declared that no competing interests exist.

## Introduction

Elective tracheotomy (ET) is performed in the ICU for airway protection in prolonged mechanical ventilation (MV), easier tracheobronchial suction, facilitation of nursing and weaning, earlier oral nutrition and to reduce trachea-laryngeal damage [1–3]. Elective percutaneous tracheotomy (EPT) was first performed in 1985 by Ciaglia [4]. Since 1985, EPT techniques have been improved and performed at the bedside in the intensive care units (ICU) [5–8]. Although recent studies suggest EPT due to several advantages, the usage of percutaneous or surgical ET is still matter of debate [9–13]. ET procedures, indications, timing and techniques in ICU might be different in accordance with countries and ICUs' features in Europe [2, 9, 14–20]. To our knowledge, no previous survey has been performed to investigate ET practices in Turkish ICUs. Hence, the aim of this study was to investigate ET practices in Turkey.

## Materials and Methods

### Study design

Ethical approval for this study (Ethical Committee N° ATADEK 2015/8) was provided by the Ethical Committee of Acibadem University Hospitals (ATADEK), Istanbul, Turkey (Chairperson Prof Ismail Hakkı Ulus) on 30 July 2015. A questionnaire was designed by the Department of Anesthesiology, Acibadem University School of Medicine. In August 2015, a questionnaire which consists of 43 questions was sent by e-mail to the directors of 238 ICUs of university, research and training, private and public hospitals which were officially recognized by The Turkish Ministry of Health. Pediatric and coronary ICUs were excluded.

### Database

Hospitals' (type, number of beds), directors' (specialist) and ICUs' (name, type, number of beds, level) demographics, the estimated number of patients in ICUs per year (admitted, mechanical ventilated, tracheotomized), experience, procedures, indications, techniques, timing, complications, advantages and disadvantages of elective tracheotomy were questioned and recorded.

### Statistical analysis

Statistical analysis was performed using the Wizard Pro Version 1.7.20. All of the variables in the database were summarized using descriptive statistics. Categorical data were compared using the chi-square or Kruskal-Wallis tests. The results were expressed as the percentage (%) and median (interquartile). A type 1 error was established at 0.05.

## Results

Two hundred and three ICUs (85.3%) participated to the present study. Number of university, private, research and training and public hospitals were 71 (35.0%), 56 (27.6%), 45 (22.2%) and 31 (15.2%) respectively. General, level III and mixed ICUs were 169 (83.4%), 177 (87.2%) and 169 (83.4%) respectively. In 189 (93.0%) ICUs, the directors of ICUs were anesthesiologists. In 197 (97%) ICUs, number of bed was over 6. In 128 (63.0%) ICUs, EPT experience was more than 5 years (Table 1). Estimated total number of admitted, mechanically ventilated and tracheotomized patients in 2014 were 126282, 80569 (63.8%) and 8989 (11.1% of all mechanically ventilated patients and 7.1% of all admitted patients) respectively.

Most common indications for ET were prolonged MV and coma (156 ICUs 76.9% and 30 ICUs 14.8% respectively). In 162 (79.8%) ICUs, the first choice for ET procedure was

**Table 1. ICUs' demographics.**

|                              | n (%)      |
|------------------------------|------------|
| <b>Type of hospitals</b>     |            |
| University                   | 71 (35.0)  |
| Private                      | 56 (27.6)  |
| Research and Training        | 45 (22.2)  |
| Public                       | 31 (15.2)  |
| <b>Type of ICUs</b>          |            |
| General                      | 169 (83.4) |
| Surgical                     | 12 (5.9)   |
| Internal Medicine            | 8 (3.9)    |
| Cardiovascular Surgery       | 6 (3.0)    |
| Pulmonology                  | 3 (1.4)    |
| Neurosurgical                | 3 (1.4)    |
| Neurological                 | 2 (1.0)    |
| <b>Directors of ICUs</b>     |            |
| Anesthesiologist             | 189 (93.0) |
| Internist                    | 7 (3.5)    |
| Pulmonologist                | 5 (2.5)    |
| Neurosurgeon                 | 1 (0.5)    |
| Thoracic surgeon             | 1 (0.5)    |
| <b>Beds</b>                  |            |
| <6                           | 6 (3.0)    |
| 6–10                         | 61 (30.0)  |
| 11–20                        | 91 (44.8)  |
| 21–30                        | 28 (13.8)  |
| >30                          | 17 (8.4)   |
| <b>Level of ICUs</b>         |            |
| I                            | 2 (1.0)    |
| II                           | 24 (11.8)  |
| III                          | 177 (87.2) |
| <b>Category of ICUs</b>      |            |
| Surgical                     | 21 (10.2)  |
| Medical                      | 13 (6.4)   |
| Mixed                        | 169 (83.4) |
| <b>EPT experience, n (%)</b> |            |
| <1 year                      | 15 (7.4)   |
| 1–5 year                     | 60 (29.6)  |
| >5 years                     | 128 (63.0) |

ICU, intensive care unit; EPT, elective percutaneous tracheotomy.

doi:10.1371/journal.pone.0166097.t001

percutaneous. ET was being performed commonly in 2<sup>nd</sup> and 3<sup>rd</sup> week (155 ICUs, 76.3%). In 143 (70.4%) ICUs, Griggs guide wire dilatation forceps (GWDF) was being used as the first choice of EPT technique. The number and percentage of ICUs using bronchoscopy and ultrasonography (USG) as a guide was only 49 (24.1%) and 20 (9.9%) ICUs respectively (Table 2). The usage of EPT and elective surgical tracheotomy (EST) was often being decided by the ICU team (182 ICUs, 89.7%; 173 ICUs, 85.2% respectively). While EPT was being performed in the ICU by the ICU team (184 ICUs 90.6%; 172 ICUs 84.7%), EST was being performed in

**Table 2. Elective tracheotomy indications, procedures, techniques and timing.**

|                                      | n (%)      |
|--------------------------------------|------------|
| ET indications                       |            |
| Prolonged MV                         | 156 (76.9) |
| Prolonged coma                       | 30 (14.8)  |
| Airway protection/suction            | 4 (2.0)    |
| ET procedure                         |            |
| Percutaneous                         | 162 (79.8) |
| Surgical                             | 31 (15.3)  |
| Timing for ET                        |            |
| In 1 <sup>st</sup> week              | 6 (3.0)    |
| In 2 <sup>nd</sup> week              | 77 (37.9)  |
| In 3 <sup>rd</sup> week              | 78 (38.4)  |
| >3 <sup>rd</sup> week                | 31 (15.3)  |
| EPT techniques                       |            |
| GWDF                                 | 143 (70.4) |
| CBR                                  | 16 (7.9)   |
| Percu-Twist                          | 9 (4.4)    |
| Multi-dilatational                   | 8 (3.9)    |
| Airway management during EPT         |            |
| Removal of endotracheal tube         | 166 (81.8) |
| Laryngeal mask                       | 19 (9.4)   |
| The usage of bronchoscopy as a guide |            |
| Yes                                  | 49 (24.1)  |
| No                                   | 135 (66.5) |
| The usage of USG as a guide          |            |
| Yes                                  | 20 (9.9)   |
| No                                   | 163 (80.3) |

CBR, Ciaglia blue rhino; ET, elective tracheotomy; EPT, elective percutaneous tracheotomy; EST, elective surgical tracheotomy; GWDF, Griggs guide wire dilatation forceps; MV, mechanical ventilation; USG, ultrasonography.

doi:10.1371/journal.pone.0166097.t002

operating room by ENT surgeon (124 ICUs 61.1%; 174 ICUs, 85.7%) (Table 3). While No:8.0 canula was used for male patients in 145 (71.4%) ICUs, No:7.0 canula was used for female patients in 127 (62.6%) ICUs. In 175 (86.2%) ICUs, decanulation was being done by the ICU team. And, in 125 (61.6%) ICUs, they were following-up tracheotomized patients during post-ICU period. 114 (56.2%) ICUs' directors stated that EPT was safer than EST (Table 3).

While most common early EPT complication was bleeding (138 ICUs, 68.0%), late EPT complication was stenosis (71 ICUs, 35.0%). Whereas facilitation of weaning was the most important advantage (53 ICUs, 26.1%), bleeding and tracheal complications were the most important disadvantages for EPT (59 ICUs, 29.1%) (Table 4). Refusal of procedure by the patient's relatives were defined as a disadvantages by the 16 ICU directors.

In private and public hospitals, anesthesiologists and general ICUs were significantly higher than other hospitals ( $p = 0.043$   $p = 0.038$  respectively). In public hospitals, level III ICUs (51.6%), frequency (54.8%) and experience (38.7%) of EPT and the usage of GWDF (41.9%) were significantly lower than other hospitals ( $p < 0.001$   $p = 0.023$   $p = 0.013$  and  $p = 0.004$  respectively) (Table 5). EPT was more preferred as the first choice for ET by 81.5% of all

**Table 3. Elective tracheotomy practices and choices.**

|                                   | n, (%)     |
|-----------------------------------|------------|
| Who does decide for EPT?          |            |
| ICU team                          | 182 (89.7) |
| ENT                               | 2 (1.0)    |
| Who is performing EPT?            |            |
| ICU team                          | 172 (84.7) |
| ENT                               | 10 (4.9)   |
| Where EPT is being performed?     |            |
| ICU                               | 184 (90.6) |
| Operating room                    | 5 (2.5)    |
| Who does decide for EST?          |            |
| ICU team                          | 173 (85.2) |
| ENT                               | 11 (5.4)   |
| Who is performing EST?            |            |
| ICU team                          | 8 (3.9)    |
| ENT                               | 174 (85.7) |
| Where EST is being performed?     |            |
| ICU                               | 65 (32.0)  |
| Operating room                    | 124 (61.1) |
| Which tracheotomy procedure?      |            |
| Obese patients                    |            |
| Percutaneous                      | 73 (36.0)  |
| Surgical                          | 114 (56.2) |
| Hemaetological disease            |            |
| Percutaneous                      | 100 (49.3) |
| Surgical                          | 84 (41.4)  |
| Patients who has had neck surgery |            |
| Percutaneous                      | 18 (8.9)   |
| Surgical                          | 169 (83.3) |
| Re-tracheotomized patients        |            |
| Percutaneous                      | 43 (21.2)  |
| Surgical                          | 142 (70.0) |
| Which ET procedure is safer?      |            |
| Percutaneous                      | 114 (56.2) |
| Surgical                          | 21 (10.3)  |
| There is no difference            | 41 (20.2)  |

ENT, ear-nose-throat; EPT, elective percutaneous tracheotomy; ET, elective tracheotomy; EST, elective surgical tracheotomy; ICU, intensive care unit.

doi:10.1371/journal.pone.0166097.t003

anesthesiologists and 65.1% of them had EPT experience > 5 years (Table 6). 3% of all directors was performing early tracheotomy (in first week) in their ICUs (Table 7).

## Discussion

The present study is the first wide survey about ET practice in Turkey and the second large survey in Europe (Table 7). In the study, All of participating units was performing ET and they were mostly managed by anesthesiologists (93.0%) (Tables 1 and 5). Moreover, anesthesiologists were also director of all cardiovascular surgery, surgical and neurological ICUs.

**Table 4. Elective percutaneous tracheotomy complications, advantages and disadvantages.**

|                                                 | n, (%)     |
|-------------------------------------------------|------------|
| <b>Early EPT complications</b>                  |            |
| bleeding                                        | 138 (68.0) |
| dislocation                                     | 25 (12.3)  |
| local infection                                 | 6 (3.0)    |
| airway obstruction                              | 4 (2.0)    |
| <b>Late EPT complications</b>                   |            |
| stenosis                                        | 71 (35.0)  |
| external scar                                   | 58 (28.6)  |
| tracheomalacia                                  | 16 (7.9)   |
| <b>EPT advantages</b>                           |            |
| Facilitation of weaning                         | 53 (26.1)  |
| Airway protection                               | 48 (23.6)  |
| Better comfort of patient                       | 26 (12.8)  |
| Easier tracheal suctioning                      | 12 (5.9)   |
| Reduced laryngeal complications                 | 12 (5.9)   |
| Reduced risk of infection                       | 11 (5.4)   |
| Reduction of sedation needs                     | 10 (4.9)   |
| Easier mouth care                               | 7 (3.5)    |
| <b>EPT disadvantages</b>                        |            |
| Bleeding and tracheal complications             | 59 (29.1)  |
| Refusal of procedure by the patient's relatives | 16 (7.9)   |
| Stenosis and scar                               | 15 (7.4)   |
| Difficulties in patient care                    | 14 (6.9)   |
| Increased risk of infection                     | 11 (5.4)   |
| Psychological trauma                            | 7 (3.5)    |
| Delayed ICU discharge                           | 5 (2.5)    |
| Disability of speaking                          | 5 (2.5)    |
| Decannulation difficulties                      | 5 (2.5)    |
| Late term fistula                               | 4 (2.0)    |
| Esthetic sequelae                               | 3 (1.5)    |
| Risk of pneumothorax                            | 3 (1.5)    |
| Decreased airway humidify                       | 2 (1.0)    |
| Cost                                            | 2 (1.0)    |

EPT, elective percutaneous tracheotomy; EST, elective surgical tracheotomy.

doi:10.1371/journal.pone.0166097.t004

We observed in the study that the most important indication for ET was prolonged MV as shown in the recent surveys (Tables 2 and 7) [2, 14, 17, 19]. EPT is a procedure which is performed more than EST in accordance with European surveys, except France [2, 9, 12, 13, 16, 17]. In recent meta-analyses, it was stated that EPT was an easy, fast, less expensive procedure but there was no difference between complications and outcomes of EPT and EST [10, 12, 13, 21, 22]. In this study, EPT was used as the first option for ET by 79.8% of all ICUs. However, we thought that EPT experience > 5 years could be a determinative factor for this choice. Because, the usage of EPT in public hospitals was the lowest when compared with others and their experience > 5 years was only 38.7% (Table 5). In recent surveys, the reluctance of ICU physicians and the lack of adequate training were some reasons why not performing EPT [2, 17, 19]. According to our results, we can conclude that EPT is much more performed by

**Table 5. Comparisons among hospitals in Turkey.**

|                                              | University    | Research & Training | Public        | Private       | P      |
|----------------------------------------------|---------------|---------------------|---------------|---------------|--------|
| n                                            | 71            | 45                  | 31            | 56            |        |
| Anesthesiologists, n (%)                     | 63 (88.7)     | 40 (88.9)           | 30 (96.8)     | 56 (100)      | 0.043  |
| General ICUs, n (%)                          | 55 (77.5)     | 34 (75.6)           | 29 (93.5)     | 51 (91.1)     | <0.038 |
| Level III ICUs, n (%)                        | 71 (100)      | 41 (91.1)           | 16 (51.6)     | 49 (87.5)     | <0.001 |
| Admitted patients (per unit in year) #       | 500 (300–750) | 760 (450–1012)      | 400 (180–600) | 467 (268–800) | 0.002  |
| Tracheotomized patients (per unit in year) # | 50 (25–75)    | 50 (25–76)          | 25 (10–50)    | 25 (25–50)    | <0.001 |
| Prolonged MV (ET indication) n, (%)          | 59 (83.1)     | 38 (84.4)           | 24 (77.4)     | 35 (62.5)     | 0.002  |
| Prolonged coma (ET indication) n, (%)        | 6 (8.5)       | 2 (5.1)             | 4 (14.3)      | 18 (32.1)     | <0.001 |
| EST, n, (%)                                  | 10 (14.1)     | 4 (8.9)             | 11 (35.5)     | 6 (10.7)      | 0.003  |
| EPT, n, (%)                                  | 58 (81.7)     | 39 (86.7)           | 17 (54.8)     | 48 (85.7)     | 0.023  |
| GWDF, n (%)                                  | 50 (70.4)     | 36 (80.0)           | 13 (41.9)     | 44 (78.6)     | 0.004  |
| EPT experience >5 years, n (%)               | 49 (69.0)     | 27 (60.0)           | 12 (38.7)     | 40 (71.4)     | 0.013  |

ET, elective tracheotomy; EPT, elective percutaneous tracheotomy; EST, elective surgical tracheotomy; GWDF, Griggs guide wire dilatational forceps; ICU, intensive care unit; MV, mechanical ventilation. Results were given as percentage and median (interquartile).

#, median (interquartile).

doi:10.1371/journal.pone.0166097.t005

experienced anesthesiologists in Turkey (Table 6). However, the fact that they usually preferred EST as the first choice in obese, surgical and re-tracheotomized patients.

It is known that multi-dilatational technique have been still preferred as EPT technique in some countries (Table 7) [14, 18]. However, single dilatation percutaneous technique was suggested due to low complication rate and it is demonstrated that GWDF was a faster method than CBR [16, 23, 24]. Yet, Cabrini et al. showed that there was no difference between mid and long term complications of single dilatation and GWDF techniques [25]. We also found that GWDF (70.4%) was often used as EPT technique in Turkey (Table 2). We think that the reason of being the first choice of this technique may be the cost and its ease.

The timing for ET is still controversial. Blot et al. said that there was no optimal time for ET in their survey [17]. Krishnan et al. defined early tracheotomy as performing tracheotomy between 1<sup>st</sup> and 7<sup>th</sup> days of MV [16]. Although it was shown that there was no enough evidence for advantages of early tracheotomy in some studies, Hosokawa et al. concluded that early tracheotomy was associated with higher rate of tracheotomy, shorter ICU stay, shorter sedation of duration and lower long-term mortality rate [26–28]. In the present survey, we found that ET was commonly performed in 2<sup>nd</sup> and 3<sup>rd</sup> week and early tracheotomy (in 1<sup>st</sup> week) was being performed by only 3% of all ICUs (Tables 2 and 7). Hence, we think that all physicians may prefer to wait for tracheotomy. Even so, in this survey, tracheotomized patients were being followed-up during post-ICU period in 125 (61.2%) ICUs.

In European surveys, it is found that the most important complications of EPT was bleeding, hypoxia and tracheal stenosis [14, 18, 19]. We also found the same early and late

**Table 6. EPT experience of ICU directors.**

|                                 | Anesthesiologists (n = 189) | Others (n = 14) |
|---------------------------------|-----------------------------|-----------------|
| EPT (the first choice), n (%)   | 154 (81.5)                  | 8 (57.1)        |
| EPT experience > 5 years, n (%) | 123 (65.1)                  | 5 (35.7)        |

EPT, elective percutaneous tracheotomy.

doi:10.1371/journal.pone.0166097.t006

**Table 7. European practices about elective tracheotomy.**

|                            | ICUs       | Directors        | Patients / year | Procedures | Indications   | Techniques  | Timing                       | Complications   | Safer method |
|----------------------------|------------|------------------|-----------------|------------|---------------|-------------|------------------------------|-----------------|--------------|
| Germany <sup>[9]</sup>     | 455 (89)   | Anesth. (45.2)   | -               | EPT (86.1) | -             | CBR (69.4)  | <3 <sup>rd</sup> week (68)   | -               | EPT (27)     |
| Turkey                     | 203 (86)   | Anesth. (93)     | 8989 (7.1)      | EPT (79.8) | Pr. MV (76.9) | GWDF (70.4) | <3 <sup>rd</sup> week (40.9) | Bleeding (68)   | EPT (56)     |
| UK <sup>[16]</sup>         | 178 (78)   | -                | -               | EPT (97)   | -             | CBR (64)    | -                            | Bleeding (70)   | -            |
| France <sup>[17]</sup>     | 152 (21.5) | -                | 2738 (7.2)      | EST (73.5) | Pr. MV (95)   | -           | <3 <sup>rd</sup> week (68)   | -               | -            |
| Italy <sup>[19]</sup>      | 131 (30)   | -                | 5960 (10.4)     | EPT (89)   | Pr. MV (58.8) | CBR (32.8)  | -                            | -               | -            |
| Spain <sup>[15]</sup>      | 100 (41.8) | -                | -               | EPT (72)   | -             | GWDF (33)   | -                            | -               | EPT (58.5)   |
| Netherland <sup>[14]</sup> | 55 (87)    | Intensivist (87) | 1500 (2.5)      | EPT (62)   | Pr. MV (95)   | MD (45.4)   | >2 <sup>nd</sup> week (29)   | Bleeding (25.4) | EPT (50)     |
| Switzerland <sup>[2]</sup> | 48 /70)    | Intensivist (50) | 1256 (1.3)      | EPT (57)   | Pr. MV (90)   | -           | 2 <sup>nd</sup> week (35)    | Bleeding (40)   | -            |
| Norway <sup>[18]</sup>     | 30 (100)   | Anesth. (100)    | -               | EPT (79)   | -             | MD (100)    | -                            | -               | -            |

CBR, Ciaglia blue rhino; EPT, elective percutaneous tracheotomy; EST, elective surgery tracheotomy; GWDF, Griggs guide wire dilatational forceps; MD, multi-dilatational; Pr. MV, prolonged mechanical ventilation. Results were given as n, percentage (%).

doi:10.1371/journal.pone.0166097.t007

complications for EPT. Although the usage of bronchoscopy as a guide is associated with increased airway pressure and carbon dioxide retention due to decreased ventilation, it is reported that it is also associated with lower complications [10, 16, 29]. Rudas et al. also stated that USG guided tracheal puncture was more accurate than the landmark technique but there was no difference in complications [30]. Jackson et al. suggested that bronchoscopy should be performed by only experienced team [31]. Bronchoscopy was not used as guide for EPT in European surveys except United Kingdom and Italy [9, 14, 15]. We also found that the usage of bronchoscopy and USG were low in the study (Table 2). Although early complications may be decreased by using bronchoscopy and USG, they are not commonly used in our country yet. We think that late complications can be related with duration of cannula in situ and type, care and position of cannulas.

Dosemeci et al. demonstrated that EPT time, low pH level and high PaCO<sub>2</sub> could be reduced by the usage of laryngeal mask [32]. However, they didn't find significant difference in complications. We already observed that only 9.4% of all participant was using laryngeal mask during EPT procedure (Table 2).

It is known that there are some benefits following tracheotomy such as improved patients' comfort, easier mobilization, reduced sedation requirement and ICU stay and increased enteral toleration [16]. In this survey, facilitation of weaning, airway protection and better comfort of patient were stated as advantages for EPT. However, it was interesting that refusal of procedure by the patient's relatives was defined as a disadvantage (Table 4). We think that it is not a disadvantage but may be an obstacle to perform EPT procedures.

## Conclusions

ET procedures are well established in Turkish ICUs. Most common indications for ET are prolonged MV and coma in our country. Although EPT is commonly preferred procedure for ET, EST is performed in obese, surgical and re-tracheotomized patients. GWDF is the most



common technique. While early ET is rarely preferred, bronchoscopy and USG are less used as a guide.

## Supporting Information

### S1 Text. Dataset.

(XLS)

### S2 Text. Questionnaire.

(PDF)

## Acknowledgments

The authors thank Necmettin Unal, Ali Abbas Yilmaz, Tulay Tuncer Peker, Umit Yasar Teke-lioglu, Hasan Kocoglu, Isa Yildiz, Yuksel Ela, Selim Turhanoglu, Ibrahim Kurt, Ozlem Sagir, Hilal Ayoglu, Demet Tok, Sinan Gursoy, Kenan Kaygusuz, Hakki Unlugenc, Dilek Ozcengiz, Huseyin Toman, Gonul Olmez Kavlak, Ali Necati Gokmen, Volkan Hanci, Bilgin Comert, Mehmet Uyar, Kubilay Demirag, Aynur Akin Karayol, Ramazan Coskun, Murat Sungur, Aliye Esmoaglu, Nazim Dogan, Huseyin Fidan, Azize Bestas, Suleyman Ganidagli, Ziya Kaya, Gul-bin Aygencel, Ulku Aygen Turkmen, Sezai Ozkan, Gokhan Inangil, Murat Hakan Terekeci, Ahmet Cosar, Seda Banu Akinci, Ebru Ortac, Saban Yalcin, Yalim Dikmen, Tughan Utku, Evren Senturk, Zerrin Demirturk, Ozkan Akinci, Nilufer Yesilot Barlas, Turkan Tugal, Melek Gura Celik, Urfettin Huseyinoglu, Hafize Oksuz, Unase Buyukkocak, Isin Gencay, Recai Dagli, Hulya Ulusoy, Engin Erturk, Ahmet Besir, Dilek Kutanis, Mustafa Kemal Aslantas, Ismail Cinel, Ali Aydin Altuncan, Funda Gok, Alper Yosunkaya, Fatma Ulger, Ahmet Dilek, Birgul Yelken Buyukkidan, Hulya Sungurtekin, Volkan Yazar, Lutfi Yavuz, Aysun Afife Kar, Dilek Memis, Volkan Inal, Ferda Kahveci, Sibel Temur, Ugur Goktas, Sevda Dizi, Baris Kirat, Aras Pirat, Kadir Idin, Huseyin Oz, Nesrin Ahu Aslan, Hakan Yilmaz, Ercument Yentur, Ayse Gunay Kale, Ayla Kabalak, Ayse Karhan Yarici, Kadriye Kahveci, Ceyda Belenli, Erhan Ozyurt, Ali Akdogan, Abdurrahman Demirci, Coskun Tas, Tuba Dorken, Burak Kucukebe, Tuncay Karahan, Cem Basmaci, Ertugrul Kilic, Emre Kisa, Sahin Omur, Bahadir Ciftci, Hatice Fidan, Mesut Unal, Nurgul Isikay, Umut Gok, Mesut Karaca, Hanife Kara, Hasan Ergin, Mustafa Kacmaz, Yavuz Orak, Aydin Halefoglu, Soner Oflazoglu, Filiz Karip, Ebru Atilla, Ahmet Akyol, Ilksen Donmez, Muge Celik, Recai Kaya, Ulku Sabuncu, Filiz Ahun, Isil Ozkocak Turan, Nevzat Mehmet Mutlu, Hulya Basar, Sema Turhan, Ali Sait Kavakli, Nilgun Kavrut Ozturk, Gokalp Soykam, Naciye Ceyda Demir, Gulay Eren, Sunkar Kaya Bayrak, Halil Erkan Sayan, Nurullah Yilmaz, Selcuk Kayir, Murat Sayin, Sedat Kaya, Serhat Yildizhan, Suheyla Unver, Cenk Kirakli, Zakir Arslan, Nur Akgun, Ceren Koksall, Ahmet Ferudun Isik, Betul Sen, Osman Ekinci, Asu Ozgultekin, Kerem Erkalp, Mevlut Comlekci, Abdulkadir Yektas, Kaan Katircioglu, Melike Korkmaz Toker, Yavuz Demiraran, Murat Aksun, Orhan Beret, Semra Demirbilek, Nilay Tas, Basar Erdivanli, Ali Fuat Erdem, Sule Vatansver, Reyhan Polat, Isil Kose, Ugur Uzun, Nihan Yapici, Huriye Berk Takir, Ayse Surhan Cinar, Sedat Saylan, Nurten Bakan, Gulsah Karaoren, Senay Goksu Tomruk, Aybuke Kekecoglu, Filiz Kosar, Cengizhan Emre, Taylan Ozgur Cetin, Levent Kilickan, Ozcan Erdemli, Deniz Atmaca, Turker Sengul, Huseyin Husnu Gonencer, Ibrahim Atakan, Canan Akinci, Aylin Cimet Ayyildiz, Unsal Arif Turan, Fevzi Toraman, Cansel Karaali, Fatma Elif Gulek, Isil Koyluoglu, Selim Candan, Mois Bahar, Tulin Tunel Erdem, Mehmet Giray Ozcam, Berjan Oguz, Ozlem Cinar, Rafi Dogan, Ayse Gurel, Ahmet Sukru Denker, Ayse Ozboz, Hasan Yilmaz, Damla Aktan, Oktay Ozturk, Nilufer Senbecerir, Kerem Caglayan, Sevdinaz Rasimoglu, Halil Ibrahim Uzunlar, Inci Ekinci, Lale Ozcan, Fikret Kutlu, Selcuk Dincer, Ali Sefik Koprulu, Simru Tugrul, Omer Atar, Mehmet

Oral, Mustafa Cetin, Duyguhan Isguven, Mehmet Akif Yasar, Hasan Yamali, Erhan Ozden, Sedef Tavukcu Ozkan, Ilhan Ocak, Birsen Kose, Mehmet Akdogan, Mehmet Fatih Cetin, Osman Arpaz, Ozgu Ozkan, Figen Leblebici, Orhan Dirlik, Filiz Tuzuner, Serdar Celebi, Umut Acar, Gülay Kır from the Turkish Tracheotomy Survey Group.

## Author Contributions

**Conceptualization:** BG NC.

**Data curation:** BG.

**Formal analysis:** BG.

**Investigation:** BG HKA.

**Methodology:** BG NC.

**Project administration:** BG NC.

**Resources:** BG NC.

**Software:** BG NC.

**Supervision:** NC.

**Validation:** BG HKA.

**Visualization:** BG NC.

**Writing – original draft:** BG.

**Writing – review & editing:** BG NC.

## References

1. van Heurn LW, Brink PR. The history of percutaneous tracheotomy. *J Laryngol Otol.* 1996; 110(8):723–6. PMID: [8869602](#).
2. Fischler L, Erhart S, Kleger GR, Frutiger A. Prevalence of tracheostomy in ICU patients. A nation-wide survey in Switzerland. *Intensive Care Med.* 2000; 26(10):1428–33. PMID: [11126252](#).
3. Mallick A, Bodenham AR. Tracheostomy in critically ill patients. *Eur J Anaesthesiol.* 2010; 27(8):676–82. doi: [10.1097/EJA.0b013e32833b1ba0](#) PMID: [20523214](#).
4. Ciaglia P, Firsching R, Syniec C. Elective percutaneous dilatational tracheostomy. A new simple bedside procedure; preliminary report. *Chest.* 1985; 87(6):715–9. PMID: [3996056](#).
5. Griggs WM, Worthley LI, Gilligan JE, Thomas PD, Myburg JA. A simple percutaneous tracheostomy technique. *Surg Gynecol Obstet.* 1990; 170(6):543–5. PMID: [2343371](#).
6. Fantoni A, Ripamonti D. A non-derivative, non-surgical tracheostomy: the translaryngeal method. *Intensive Care Med.* 1997; 23(4):386–92. PMID: [9142576](#).
7. Byhahn C, Lischke V, Halbig S, Scheifler G, Westphal K. [Ciaglia blue rhino: a modified technique for percutaneous dilatation tracheostomy. Technique and early clinical results]. *Anaesthesist.* 2000; 49(3):202–6. PMID: [10788989](#). doi: [10.1007/s001010050815](#)
8. Frova G, Quintel M. A new simple method for percutaneous tracheostomy: controlled rotating dilation. A preliminary report. *Intensive Care Med.* 2002; 28(3):299–303. doi: [10.1007/s00134-002-1218-5](#) PMID: [11904659](#).
9. Kluge S, Baumann HJ, Maier C, Klose H, Meyer A, Nierhaus A, et al. Tracheostomy in the intensive care unit: a nationwide survey. *Anesth Analg.* 2008; 107(5):1639–43. doi: [10.1213/ane.0b013e318188b818](#) PMID: [18931225](#).
10. Delaney A, Bagshaw SM, Nalos M. Percutaneous dilatational tracheostomy versus surgical tracheostomy in critically ill patients: a systematic review and meta-analysis. *Crit Care.* 2006; 10(2):R55. doi: [10.1186/cc4887](#) PMID: [16606435](#); PubMed Central PMCID: PMCPMC1550905.

11. Angel LF, Simpson CB. Comparison of surgical and percutaneous dilational tracheostomy. *Clin Chest Med.* 2003; 24(3):423–9. PMID: [14535216](#).
12. Dulguerov P, Gysin C, Perneger TV, Chevrolet JC. Percutaneous or surgical tracheostomy: a meta-analysis. *Crit Care Med.* 1999; 27(8):1617–25. PMID: [10470774](#).
13. Freeman BD, Isabella K, Lin N, Buchman TG. A meta-analysis of prospective trials comparing percutaneous and surgical tracheostomy in critically ill patients. *Chest.* 2000; 118(5):1412–8. PMID: [11083694](#).
14. Fikkers BG, Fransen GA, van der Hoeven JG, Briede IS, van den Hoogen FJ. Tracheostomy for long-term ventilated patients: a postal survey of ICU practice in The Netherlands. *Intensive Care Med.* 2003; 29(8):1390–3. doi: [10.1007/s00134-003-1824-x](#) PMID: [12879247](#).
15. Anon JM, Escuela MP, Gomez V, Garcia de Lorenzo A, Montejo JC, Lopez J. Use of percutaneous tracheostomy in intensive care units in Spain. Results of a national survey. *Intensive Care Med.* 2004; 30(6):1212–5. doi: [10.1007/s00134-004-2276-7](#) PMID: [15118816](#).
16. Krishnan K, Elliot SC, Mallick A. The current practice of tracheostomy in the United Kingdom: a postal survey. *Anaesthesia.* 2005; 60(4):360–4. doi: [10.1111/j.1365-2044.2004.04106.x](#) PMID: [15766339](#).
17. Blot F, Melot C, Commission d'Epidemiologie et de Recherche C. Indications, timing, and techniques of tracheostomy in 152 French ICUs. *Chest.* 2005; 127(4):1347–52. doi: [10.1378/chest.127.4.1347](#) PMID: [15821214](#).
18. Sollid SJ, Strand K, Soreide E. Percutaneous dilatational tracheotomy in the ICU: a Norwegian survey focusing on perceived risk and safety attitudes. *Eur J Anaesthesiol.* 2008; 25(11):925–32. doi: [10.1017/S0265021508004791](#) PMID: [18578955](#).
19. Vargas M, Servillo G, Arditi E, Brunetti I, Pecunia L, Salami D, et al. Tracheostomy in Intensive Care Unit: a national survey in Italy. *Minerva Anesthesiol.* 2013; 79(2):156–64. PMID: [23174923](#).
20. Blot F, Similowski T, Trouillet JL, Chardon P, Korach JM, Costa MA, et al. Early tracheostomy versus prolonged endotracheal intubation in unselected severely ill ICU patients. *Intensive Care Med.* 2008; 34(10):1779–87. doi: [10.1007/s00134-008-1195-4](#) PMID: [18592210](#).
21. Putensen C, Theuerkauf N, Guenther U, Vargas M, Pelosi P. Percutaneous and surgical tracheostomy in critically ill adult patients: a meta-analysis. *Crit Care.* 2014; 18(6):544. doi: [10.1186/s13054-014-0544-7](#) PMID: [25526983](#); PubMed Central PMCID: [PMC4293819](#).
22. Oliver ER, Gist A, Gillespie MB. Percutaneous versus surgical tracheostomy: an updated meta-analysis. *Laryngoscope.* 2007; 117(9):1570–5. doi: [10.1097/MLG.0b013e318093edae](#) PMID: [17667139](#).
23. Nates JL, Cooper DJ, Myles PS, Scheinkestel CD, Tuxen DV. Percutaneous tracheostomy in critically ill patients: a prospective, randomized comparison of two techniques. *Crit Care Med.* 2000; 28(11):3734–9. PMID: [11098982](#).
24. Van Heurn LW, Mastboom WB, Scheeren CI, Brink PR, Ramsay G. Comparative clinical trial of progressive dilatational and forceps dilatational tracheostomy. *Intensive Care Med.* 2001; 27(1):292–5. PMID: [11280651](#).
25. Cabrini L, Landoni G, Greco M, Costagliola R, Monti G, Colombo S, et al. Single dilator vs. guide wire dilating forceps tracheostomy: a meta-analysis of randomised trials. *Acta Anaesthesiol Scand.* 2014; 58(2):135–42. doi: [10.1111/aas.12213](#) PMID: [24410105](#).
26. Hosokawa K, Nishimura M, Egi M, Vincent JL. Timing of tracheotomy in ICU patients: a systematic review of randomized controlled trials. *Crit Care.* 2015; 19:424. doi: [10.1186/s13054-015-1138-8](#) PMID: [26635016](#); PubMed Central PMCID: [PMC4669624](#).
27. Rumbak MJ, Newton M, Truncale T, Schwartz SW, Adams JW, Hazard PB. A prospective, randomized, study comparing early percutaneous dilational tracheotomy to prolonged translaryngeal intubation (delayed tracheotomy) in critically ill medical patients. *Crit Care Med.* 2004; 32(8):1689–94. PMID: [15286545](#).
28. Maziak DE, Meade MO, Todd TR. The timing of tracheotomy: a systematic review. *Chest.* 1998; 114(2):605–9. PMID: [9726751](#).
29. Walz MK, Peitgen K, Thurauf N, Trost HA, Wolfhard U, Sander A, et al. Percutaneous dilatational tracheostomy—early results and long-term outcome of 326 critically ill patients. *Intensive Care Med.* 1998; 24(7):685–90. PMID: [9722038](#).
30. Rudas M, Seppelt I, Herkes R, Hislop R, Rajbhandari D, Weisbrodt L. Traditional landmark versus ultrasound guided tracheal puncture during percutaneous dilatational tracheostomy in adult intensive care patients: a randomised controlled trial. *Crit Care.* 2014; 18(5):514. doi: [10.1186/s13054-014-0514-0](#) PMID: [25231604](#); PubMed Central PMCID: [PMC4189189](#).
31. Jackson LS, Davis JW, Kaups KL, Sue LP, Wolfe MM, Bilello JF, et al. Percutaneous tracheostomy: to bronch or not to bronch—that is the question. *J Trauma.* 2011; 71(6):1553–6. doi: [10.1097/TA.0b013e31823ba29e](#) PMID: [22182866](#).

32. Dosemeci L, Yilmaz M, Gurpinar F, Ramazanoglu A. The use of the laryngeal mask airway as an alternative to the endotracheal tube during percutaneous dilatational tracheostomy. *Intensive Care Med.* 2002; 28(1):63–7. doi: [10.1007/s00134-001-1161-x](https://doi.org/10.1007/s00134-001-1161-x) PMID: [11819002](https://pubmed.ncbi.nlm.nih.gov/11819002/).
